# Supplementary material for: Early Austronesians Cultivated Rice and Millet Together: Tracing Taiwan’s First Neolithic Crops
Source: Front Plant Sci. 2022 Jul 22;13:962073. doi: 10.3389/fpls.2022.962073 (PMC9355678; doi:10.3389/fpls.2022.962073)
Supplement: Supplementary file 1 [file Data_Sheet_1.xlsx]

## Sheet: Sheet1
Supplementary Tables
Early Austronesians Cultivated Rice and Millet Together: Tracing Taiwan's First Neolithic Crops
Zhenhua Deng1,2*, Su-chiu Kuo3, Mike T. Carson4, Hsiao-chun Hung5*
1 Center for the Study of Chinese Archaeology, Peking University, Beijing, 100871, China
2 School of Archaeology and Museology, Peking University, Beijing, 100871, China
3 Institute of History and Philology, Academia Sinica, Taipei, 115201, Taiwan
4 Micronesian Area Research Center, University of Guam, Mangilao, Guam, 96913, USA
5 Department of Archaeology and Natural History, The Australian National University, Canberra, ACT 2601, Australia
Corresponding
Zhenhua Deng: zhenhuadeng@pku.edu.cn
Hsiao-chun Hung: hsiao-chun.hung@anu.edu.au

## Sheet: Table S1
Table S1 Macroscopic plant remains from the Zhiwuyuan site
Sample NO.		X-0199-Ed01	Ed-L52-0101	Ed-L52-0102	Ed-L50-0101	Ed-L5152-0102	Ed-L5152-0101	Ed-L51-0101	Ed-L47-0003	Ed-L4142-0001	Ed-L4142-0002	X-0102-Ed01	Ed-L44-0004	X-0152-Ed01	Ed-L5051-0001	X-0118-Ed01	Ed-L4647-0001	Ed-L46-0003	X-0094-Ed01	Ed-L48-0003	Ed-L5051-0002	Ed-L45-0004	X-0159-Ed01	Ed-L45-0001	Ed-L45-0007	Ed-L45-0005	Ed-L45-0006	X-0153-Ed01	Ed-L44-0003	Ed-L47-0004	Ed-L42-0005	Ed-L52-0003	Ed-L45-0008	Ed-L40-0002	Ed-L43-0006	Ed-L56-0002	X-0292-Ed01	Ed-L52-0002	X-0119-Ed01	X-0120-Ed01	X-0163-Ed01	Ed-L53-0005	Ed-L53-0006	X-0171-Ed01	X-0173-Ed01	X-0179-Ed01	X-0209-Ed01	X-0117-Ed01	X-0123-Ed01
Context NO.		T15P04L57	T16P03L52F153	T16P03L52F153	T17P03L50F153	T17P03L51-52F153	T17P03L51L52F153	T17P05P06L51	T20P4L47F43	T21P10L41L42F133	T21P10L41L42F133	T21P10L42F133	T21P10L44F133	T21P10L47 F133	T22P1P2L50L51	T22P2L51	T23P10L46L47 F130	T24P10L46F130	T24P10L46L47 F130	T24P10L48F130	T24P10L50L51 F130	T24P1P2L45	T24P1P2L49	T25P4P5L45 F54	T25P5L45	T26P1P2L45	T26P1P2L45	T26P2L50F59	T27P10P11L44F133	T27P2L47	T28P1P2L42F53	T28P5L52	T29P11L45F129	T29P1L40 F53	T29P2L43F53	T29P4L56	T29T30P11L45L46F129	T30-T32P4P5L52 F56	T30-T32P4P5L52 F56	T30-T32P4P5L52 F56	T30-T32P4P5L52 F56	T30-T32P4P5L53 F56	T30-T32P4P5L53 F56	T30-T32P4P5L53 F56	T30-T32P4P5L53 F56	T30-T32P4P5L53 F56	T30-T32P4P5L53 F56	T30-T32P4P5L53F56	T30-T32P4P5L53F56
Period		Xuntangpu	Xuntangpu	Xuntangpu	Xuntangpu	Xuntangpu	Xuntangpu	Xuntangpu	Xuntangpu	Xuntangpu	Xuntangpu	Xuntangpu	Xuntangpu	Xuntangpu	Xuntangpu	Xuntangpu	Xuntangpu	Xuntangpu	Xuntangpu	Xuntangpu	Xuntangpu	Xuntangpu	Xuntangpu	Xuntangpu	Xuntangpu	Xuntangpu	Xuntangpu	Xuntangpu	Xuntangpu	Xuntangpu	Xuntangpu	Xuntangpu	Xuntangpu	Xuntangpu	Xuntangpu	Xuntangpu	Xuntangpu	Xuntangpu	Xuntangpu	Xuntangpu	Xuntangpu	Xuntangpu	Xuntangpu	Xuntangpu	Xuntangpu	Xuntangpu	Xuntangpu	Xuntangpu	Xuntangpu
Volume (L)		1.6	6.2	8	6	8	8.5	6		40	40	5	3.4	5		1.5	4.5	5	34	5.4	3	3	2.1		6	4	5	2.2	4	6	6	1	7	6	2		64	10	1.9	4	5	5	4	10	5	3.5	8	4	4.3
Cereal crops																																								4
Rice	Oryza sativa grain		2				2			1		1					2		3		14				1		1							1			2			1				2					1
	Oryza sativa grain fragments											3																1
	Oryza sativa grain tiny fragments		2	2		2	2		5	1		17	32	7			4	3			13	22	2		161	2	3	2			2		6	5		2				1	6			8	6	1	11		3
	Oryza sativa immature grain		2								1	3			1				2		52				1					4							10	2	2					1	2	5			2
	Oryza sativa immature grain fragments														36				202	18	985			74			4		6	41			6				47						1	49	34			7	6
	Oryza stativa embryo				2	3	1		35	9		117	63	13	175		113	22	35	135	207	35	2	148	415	33	95	7	19	424	1		68	14		1	760	187			146			284	141		38
	cf. Oryza stativa embryo																							39			62										202
	Oryza stativa husk fragment								72	2		49	11	18			21		146	8	60	120	5	488	391	68	81	3	2	319			31	23		2	1009	3			561	3	18	131	83		37
	Oryza spikelet base			1					280	22		349	144	167	7602		143	1	1902	28	94	479	182	2923	2726	287	781	36	36	2705	24		231	222		31	4889	16			2481		79	1385	1968		141
Foxtail millet	Setaria italica									1					72		4	1	1	4				4	6		1	7	1	6			2			2	23							7	6
	Setaria italica grain fragments											1			67									4			2			5											3			4	4
	Setaria italica immature														77		3			3		3			9	2	6						11			1	32				3			11	11
	Setaria italica immature grain fragments																																				26
	Setaria italica immature grain fragments								5	5		11	6	10	313		32	1	8	39					46	2	9		6	26			30				315	8			37		1	19	22		8
Fruits
Ebenaceae	Diospyros sp.																									1
Actinidiaceae	Actinidia sp.					4
Caprifoliaceae	Sambucus sp.	11	10	36	28	23	43	35							51	12			5	2	15									1		29				939		1502	31	27	11	1	5	153	81	36	97	100	72
Moraceae	Broussonetia papyrifera		1				1								3	1		1					1													14		19		2		1		9	4		1		1
Rosaceae	Rubus sp.			1	1	4	2								250						4											1				119		19			18		3	9	10		11	3
Vitaceae	Vitis sp.																																			25
Cucurbitaceae	Cucumis sp.																																			5
	Benincasa sp.																																			1
	Cucurbitaceae			1			1																													2
unidentifed kernel															10																													5	1				1
unidentifiable fruit husk
Grasses
Panicoideae	Setaria sp.											1			24		7		3	2	2	1	1	58			1	1		10						3	28				5			2	7		2
	Echinochloa sp.
	Digitatia sp.											1			14										1																1
	Eleusine indica													1
	Panicoideae																1										2			1														3
Pooideae																					3									1
Poaceae																								1
Other weeds
Cyperaceae	Fimbristylis sp.																																				1
	Scirpus sp.		1	4			1	3						1	6						9	1		2	1					2				1		3				1			1		4
	Cyperus iria	1																																		1
	Cyperaceae																	6
Polygonaceae		1					1																													15								1
Moraceae	Humulus scandens																																			4
Amaranthaceae	Chenopodium sp.			1									1				2			4		1														1								1
Lamiaceae	Perilla frutescens
	Lamiaceae																													1
Aizoaceae	Mollugo sp.
Euphorbiaceae	Acalypha australis	3													1
Oxalidaceae	Oxalis corniculata																		1	1																3								1
Asteraceae																	1																			3
Solanaceae						2						2	4		3			1			1				1								1			38	2							1
Caryophyllaceae		3																	3	1	1																						18
Portulacaceae																																															1
Brassicaceae		1
Verbenaceae																											1
Fabaceae
Unidentified seed		2	2	15	4	15	10		1						5	2	1			1							2	20								69		59	2	8	2	1	1	4	2	4		2	5
Total counts		22	20	61	35	53	64	38	398	41	1	555	261	217	8710	15	334	36	2311	246	1460	662	193	3741	3759	395	1051	77	70	3546	27	30	386	266	0	1284	7346	1815	35	40	3274	6	127	2090	2386	46	347	112	91
[truncated: 272 more columns]

## Sheet: Table S2
Table S2 Radiocarbon dates of Zhiwuyuan, Dalongdong, Anhelu and Nanguanlidong
Site	Lab NO.	Context NO.	Period	Dated Material	Radiocarbon Date	Calibrated Date (95.4% probobility, cal.BP)	Reference
Zhiwuyuan	Beta - 616784	T35-36P5L55-57F63	Xuntangpu	295 rice spikelet bases	3870±30	4411-4158	this study
	Beta - 616785	T32P5L54F56	Xuntangpu	1 immature rice grain	3740±30	4226-3984
	BA220023	T30-32P4-5L53F56	Xuntangpu	2 rice grain fragments	3690±25	4143-3928
	BA220024	T16P03L52F153	Xuntangpu	1 immature rice grain	3655±30	4086-3893
	BA171658	T22P1P2L50L51	Xuntangpu	1 rice grain fragment	3920±60	4521-4155
	BA171659	T22P1P2L50L51	Xuntangpu	10 foxtail millet grains	3995±25	4523-4415
	BA220025	T22P1P2L50L51	Xuntangpu	16 foxtail millet grains	3775±30	4243-3998
	BA220026	T24P10L50L51F130	Xuntangpu	1 rice grain fragment	3750±25	4230-3987
	BA220027	T25P5L45	Xuntangpu	1 rice grain fragment	3920±30	4425-4242
	Beta-285437	TP4L72e&f	Xuntangpu	Charcoal	3870±40	4414-4155	Chiu, S. C., Chu, C. Y., Tai, Z. J., and Tsai, C. F. (2010). Taipei MRT Future Routes Investigation and Analysis, and Civil Construction Basic Design Service Tender DX102 Wanda-Zhonghe-Shulin LG 02 Station Botanical Garden Site Archaeological Excavation Report and Follow-up Maintenance and Management Recommendations. Tainan: Tree Valley Foundation commissioned by Sinotech Engineering Consultants,…
	NTU-4585	TP2L46&L47	Xuntangpu	Charcoal	3880±150	4815-3897	Liu, Y. C., Kuo, S. C., Lin, S. F., and Lin, M. C. (2006). Archaeological Survery and Evaluation Report of Zhiwuyuan and Nanhaixueyuan in Taipei City. Nantou: Cultural Associations of Taritsi archi. (in Chinese)
	NTU-3979	D4	Xuntangpu	Charcoal	3920±60	4521-4155	Chen, T., and Kuo, S.C. (2004). Research Project of the Collected Remains from the Zhiwuyuan Site of Taipei City. Taipei: Sanxia Junior High School. (in Chinese)
	NTU-3795	D4	Xuntangpu	Charcoal	4120±120	4831-4446
	BA220028	T21P2L20	Zhiwuyuan	1 rice grain fragment	1810±25	1786-1618	This study
	NTU-3226	-	Zhiwuyuan	Charcoal	2140±150	2671-1720	Liu, Y. C., and Kuo, S. C. (2000). Field Survey and Research of Archaeological Sites in Taipei City. Taipei: Department of Civil Affairs of Taipei City Government. (in Chinese)
	NTU-3230	-	Zhiwuyuan	Charcoal	1890±140	2296-1421
	NTU-4587	-	Zhiwuyuan	Charcoal	2050±120	2322-1736	Liu, Y. C., Kuo, S. C., Lin, S. F., and Lin, M. C. (2006). Archaeological Survery and Evaluation Report of Zhiwuyuan and Nanhaixueyuan in Taipei City. Nantou: Cultural Associations of Taritsi archi. (in Chinese)
	Beta-283681	-	Zhiwuyuan	Charcoal	1940±40	1983-1743	Chiu, S. C., Chu, C. Y., Tai, Z. J., and Tsai, C. F. (2010). Taipei MRT Future Routes Investigation and Analysis, and Civil Construction Basic Design Service Tender DX102 Wanda-Zhonghe-Shulin LG 02 Station Botanical Garden Site Archaeological Excavation Report and Follow-up Maintenance and Management Recommendations. Tainan: Tree Valley Foundation commissioned by Sinotech Engineering Consultants,…
	Beta-283682	-	Zhiwuyuan	Charcoal	1900±40	1924-1716
	Beta-285436	-	Zhiwuyuan	Charcoal	1890±40	1920-1712
	Beta-285435	-	Zhiwuyuan	Charcoal	1840±40	1865-1623	Chiu, S. C., Chu, C. Y., Tai, Z. J., and Tsai, C. F. (2010). Taipei MRT Future Routes Investigation and Analysis, and Civil Construction Basic Design Service Tender DX102 Wanda-Zhonghe-Shulin LG 02 Station Botanical Garden Site Archaeological Excavation Report and Follow-up Maintenance and Management Recommendations. Tainan: Tree Valley Foundation commissioned by Sinotech Engineering Consultants,…
	Beta-283680	-	Zhiwuyuan	Charcoal	1820±40	1827-1613
	NTU-5202	-	Zhiwuyuan	Charcoal	2010±50	2103-1826	Liu Y. C. (2011). Rescue Excavation Report of the Zhiwuyuan Site in Taipei City 2009-2011. Taipei: Bureau of Animal and Plant Health Inspection and Quarantine, Council of Agriculture, Executive Yuan. (in Chinese)
	NTU-5237	-	Zhiwuyuan	Charcoal	2070±50	2290-1888
	NTU-5248	-	Zhiwuyuan	Charcoal	2170±80	2343-1949
	NTU-5288	-	Zhiwuyuan	Charcoal	2130±60	2312-1945
	NTU-5293	-	Zhiwuyuan	Charcoal	2120±80	2330-1892
	NTU-5297	-	Zhiwuyuan	Charcoal	2570±50	2772-2490
	NTU-5304	-	Zhiwuyuan	Charcoal	2040±60	2146-1829
	NTU-5326	-	Zhiwuyuan	Charcoal	2180±50	2330-2007
	NTU-5340	-	Zhiwuyuan	Charcoal	2200±60	2340-2009
	NTU-5348	-	Zhiwuyuan	Charcoal	2140±50	2310-1992
	NTU-5353	-	Zhiwuyuan	Charcoal	2580±50	2779-2492
	NTU-5357	-	Zhiwuyuan	Charcoal	2130±80	2334-1926
	NTU-5361	-	Zhiwuyuan	Charcoal	2260±70	2427-2010
	NTU-5385	-	Zhiwuyuan	Charcoal	1970±50	2001-1744
	NTU-5392	-	Zhiwuyuan	Charcoal	2080±50	2295-1890
	NTU-5394	-	Zhiwuyuan	Charcoal	2090±50	2298-1894
	NTU-5395	-	Zhiwuyuan	Charcoal	2120±50	2305-1943
	NTU-5396	-	Zhiwuyuan	Charcoal	2060±50	2287-1880
	Beta-348596	-	Zhiwuyuan	Charcoal	2030±30	2096-1882	Chiu, S. C., Chu, C. Y., Zhang, Y. S., Su, Q.Q., and Chuang, S.Y. (2014) Report for the rescue excavation of the Zhiwuyuan site in 2013. Tainan: Tree Valley Foundation commissioned by Sinotech Engineering Consultants, Ltd. (in Chinese)
	Beta-348597	-	Zhiwuyuan	Charcoal	2030±30	2096-1882
	Beta-348598	-	Zhiwuyuan	Charcoal	1950±30	1986-1750
Dalongdong	Beta-299031	-	Xuntangpu	Charcoal	3800±30	4411-4158	Chu, C. Y. (2012). Report on the Restoration, Excavation, Construction, and Supervision of the Dalongdong Site. Taipei: Department of Cultural Affairs, Taipei City Government. (in Chinese)
	Beta-299032	-	Xuntangpu	Charcoal	3850±30	4292-4087
	Beta-299030	-	Xuntangpu	Charcoal	3870±30	4405-4153
	Beta-299033	-	Xuntangpu	Charcoal	3950±30	4519-4291
	NTU-5329	-	Xuntangpu	Charcoal	3970±100	4815-4149
	NTU-5302	-	Xuntangpu	Charcoal	4100±50	4823-4443
	NTU-5315	-	Xuntangpu	Charcoal	4110±50	4824-4447
	NTU-4737	-	Xuntangpu	Charcoal	4020±100	4826-4240	Liu, Y. C. (2007). Final Report of the Test Excavation in the Dalong Primary School of Taipei. Taipei: Department Affairs of Cultural Affairs, Taipei City Government. (in Chinese)
	ANU-58709	-	Xuntangpu	1 rice grain	3875±20	4410-4189	this study
	ANU-58710	-	Xuntangpu	1 rice grain	3975±20	4520-4409
	ANU-58711	-	Xuntangpu	1 rice grain	3980±20	4520-4411
Anhelu	-	WTP2L18	Niumatou	Charcoal	4850±30	5654-5479	Chu, W. L. (2016). Rescue Excavation Report of the Anhelu Site. Taichung: National Museum of Natural Science. (in Chinese)
	-	WTP1L26	Niumatou	Charcoal	4140±30	4824-4533
	-	WTP1L22M1	Niumatou	human bone	4010±30	4567-4414
	-	WTP6L16	Niumatou	Charcoal	3990±30	4526-4409
	-	WTP5L18F3	Niumatou	Charcoal	3890±30	4417-4188
	-	WTP5L12	Niumatou	Charcoal	3730±30	4221-3981
	-	WTP1L12	Niumatou	Charcoal	4300±30	4960-4830
	-	WT6P3L22M40	Niumatou	human bone	4240±30	4861-4651
Nanguanlidong	NTU-3987	E4T6P4L50F1	late Dabenkeng-Niuchouzi	Charcoal	3860±60	4422-4091	Chu, C. Y. (2012). Report on the Restoration, Excavation, Construction, and Supervision of the Dalongdong Site. Taipei: Department of Cultural Affairs, Taipei City Government. (in Chinese)
	NTU-3977	E4-T6P3L47-F1-o	late Dabenkeng-Niuchouzi	Charcoal	4020±60	4807-4296
	NTU-4384	E4T6P4L50F1	late Dabenkeng-Niuchouzi	Charcoal	4150±140	5047-4245
	NTU-4376	E4-T6P3L47-F1-c	late Dabenkeng-Niuchouzi	Charcoal	4250±100	5263-4447
	NZA-27861	E3-T4P6L50b	late Dabenkeng-Niuchouzi	Charcoal	4109±30	4816-4522
	NTU-3974	F4-T3P6L53a	late Dabenkeng-Niuchouzi	Charcoal	4110±50	4824-4447
	NTU-4385	F4-T3P6L53a	late Dabenkeng-Niuchouzi	Charcoal	4120±100	4866-4405
	NTU-4381	E3-T5P4L59F2-2	late Dabenkeng-Niuchouzi	Charcoal	4170±80	4862-4445
	NTU-3983	E3-T5P4L59F2-2	late Dabenkeng-Niuchouzi	Charcoal	4350±60	5272-4828

## Sheet: Table S3
Table S3 Rice grain measurements of Zhiwuyuan, Dalongdong and Anhelu
Site	Sample NO.	Length	Width	Thickness
Zhiwuyuan	Ed-L5051-0002	3.90975	2.52494	2.04133
	Ed-L5051-0002	4.33547	2.1759	1.32828
	Ed-L5051-0002	4.31089	2.63155	1.73005
	Ed-L5051-0002	4.19	2.8944	2.13158
	Ed-L5051-0002	4.26156	1.98544	1.64827
	Ed-L5051-0002	3.51878	2.12482	1.53308
	Ed-L5051-0002	3.81894	1.79684	1.51839
	Ed-L5051-0002	3.79719	2.43564	1.80471
	X-0094-Ed01	3.8601	2.86019	2.18087
	Ed-L47-0005	4.26257	2.91041	2.00854
	Ed-L50-0006	3.46953	2.32143	1.74072
	Ed-L5152-0101	3.50758	1.91831	1.34454
	Ed-L5152-0101	2.8519	2.18677	1.95115
	Ed-L52-0101	4.05633	2.75458	2.0344
	X-0292-Ed01	5.0171	2.84507	2.54964
	X-0292-Ed01	4.07362	2.75447	2.00874
	Ed-L45-0006	3.9885	2.8133	1.92651
	Ed-L45-0007	4.5782	2.3627	1.83639
	Ed-L47-0006	4.0076	2.60496	1.71335
	Ed-L49-0004	4.42537	2.79557	1.91222
	Ed-L50-0007	3.9753	2.39399	1.36904
	X-0123-Ed01	4.5401	3.00861	1.93531
Dalongdong	EB-002	4.48	2.3	1.82
	EB-003	3.61	2.62	1.88
	EB-004	5.1	2.58	2.06
	EB-005-1	4	2.54	1.62
	EB-005-2	4.16	2.45	1.81
	EB-005-3	3.48	2.86	1.82
	EB-007	5.34	2.63	2.12
	EB-008	3.57	2.79	1.79
	EB-009-1	4.03	2.12	1.42
	EB-009-2	3.07	1.9	1.13
	EB-010-1	5.56	2.53	1.71
	EB-010-2	5.68	2.73	1.77
	EB-012	3.6	2.24	1.4
	EB-014	4.7	3.06	2.27
	EB-015	4.84	2.92	1.83
	EB-016	4.79	2.68	1.58
	EB-021-1	4	2.24	1.88
	EB-021-2	3.34	2.01	1.16
	EB-021-3	4.1	2.32	1.6
Anhelu	EB-002	3.74	2.16	1.66
	EB-004	3.5	2.32	1.58
	EB-006	3.52	2	1.67
	EB-007	2.69	1.6	1.35

## Sheet: Table S4
Table S4 Major sites with rice and/or millets in Southern China and Southeast Asia (Sites listed in Figure 10)
NO.	Site	N	E	Date (cal.BP)	rice	foxtail millet	broomcorn millet	Reference
1	Gaopo	28.4692	102.168	3300–2800	√		√	Jiang, M., Geng, P., Liu, L., and Zuo, Z. (2013). Flotation Results and Analysis on Gaopo Site in Mianning County in 2011. Archaeological Discoveries in Chengdu, 317–330. (in Chinese).
2	Henglanshan	27.8451	102.364	4800–4600	√	√	√	Jiang, M., Hu, T., Bu, Q., and Wang, H. (2016). Flotation Results on Henglanshan Site in Xichang City in 2011 and 2013. Archaeological Res. Chengdu (3), 503–515. (in Chinese).
3	Shapingzhan	27.7505	102.151	3000–2800	√	√		Yan, X., Jiang, M., Zuo, Z., and Bu, Q. (2016). Flotation Results and Analysis on Shapingzhan Site in Xichang City in 2014. Archaeological Discoveries in Chengdu, 155–162. (in Chinese).
4	Guijiabao	27.4505	101.608	5000–3700	√	√	√	Huan, X., Deng, Z., Zhou, Z., Yan, X., Hao, X., Bu, Q., and Lu, H. (2022). The Emergence of Rice and Millet Farming in the Zang–Yi Corridor of Southwest China Dates Back to 5000 Years Ago. Frontiers in Earth Science, 10, 874649.
5	Haimenkou	26.4624	99.9181	3600–3100; 2800–2400	√	√	√	Xue, Y., Dal Martello, R., Qin, L., Stevens, C. J., Min, R., and Fuller, D. Q. (2022). Post–neolithic Broadening of Agriculture in Yunnan, China: Archaeobotanical Evidence from Haimenkou. Archaeological Res. Asia 30, 100364. doi:10.1016/j.ara.2022.100364
6	Shilinggang	25.6469	98.884	2700–2300	√	√		Li, H., Zuo, X., Kang, L., Ren, L., Liu, F., Liu, H., et al. (2016). Prehistoric Agriculture Development in the Yunnan–Guizhou Plateau, Southwest China: Archaeobotanical Evidence. Sci. China Earth Sci. 59 (8), 1562–1573.
7	Baiyangcun	25.8445	100.592	4650–4050	√	√	√	DalMartello, R., Min, R., Stevens, C., Higham, C., Higham, T., Qin, L., et al. (2018). Early Agriculture at the Crossroads of China and Southeast Asia: Archaeobotanical Evidence and Radiocarbon Dates from Baiyangcun, Yunnan. J. Archaeological Sci. Rep. 20, 711–721.
8	Dadunzi	25.7096	101.908	4000–3600	√	√	√	Jin, H., Liu, X.,Min, R., Li, X., and Wu, X. (2014). Flotation Results and Analysis on Dadunzi Site in Yuanmou County, Yunnan. Jianghan Archaeology 3, 109–114. (in Chinese).
9	Yubeidi	26.1843	103.138	2500–2200	√	√		Yang, W., Jiang, Z., and Chen, X. (2020). A Preliminary Study on Plant Remains from the Yubeidi Site. Agric. Hist. China 39 (1), 3–11.
10	Shifodong	23.3655	99.4316	3400–3100	√			Zhao, Z. (2010). Report of Plant Remains at the Shifodong Site, Shifodong in Gengma County. Beijing: Cultural Relics Press, 368–373.
11	Heposuo	24.7181	102.605	2500–2000	√	√	√	Yang, W., Jiang, Z., Yao, H., and Chen, X. (2021). A Study on Agriculture Structure in the Shizhaishan Period of Dianchi Region, Yunnan. Agric. Hist. China 40 (2), 36–47.
12	Guangfentou	24.3498	102.86	2800–2000	√	√	√	Li, X., and Liu, X. (2016). Flotation Results and Analysis on Gunagfentou Site in Jiangchuan, Yunnan. Agric. Archaeology 3, 20–27.
13	Xueshan	24.6512	102.939	2500–2000	√	√	√	Wang,Q., Jiang, Z., Yang, W., and Chen, X. (2019). Plant Remains from the Xueshan Site in Chengjiang County of Yunnan Province. Agric. Hist. China 2, 3–11. (in Chinese).
14	Gantuoyan	23.4129	105.845	3800–3600	√	？		Archaeology Team of Guangxi Zhuang Autonomous Region, Napo Museum. (2003). Excavation of Gantuoyan site in Napo county, Guangxi . Archaeology, (10): 35–56. (in Chinese)
15	Xiaojin	26.0787	110.708	4500	√			Zhang, C., and Hung, H. C. (2009). The emergence of agriculture in South and Southwest China. Cultural Relics in Southern China, (3): 64–71. (in Chinese)
16	Niucheng	27.9119	115.486	3500–2500	√	√	√	Chen, X., Zhou, G., and Gong, W. (2015). A preliminary analysis on the carbonized seeds and fruits from Niucheng site (2006–2008) Xin’gan County, Jiangxi Province. Jianghan Archaeology (Jianghan Kaogu) 3:100–115 (in Chinese)
17	Guodishan	27.5023	116.304	4800–4400; 3800–2900	√	√		Deng, Z., Yan, Z., and Yu, Z. (2020). Bridging the gap on the Southward Dispersal Route of Agriculture in China: New Evidences from the Guodishan Site, Jiangxi Province. Archaeol. Anthropol. Sci. 12:151.
18	Shanyawei	28.4834	118.492	5000–4200	√	√	√	Unpublished data
19	Hulushan	27.5134	118.015	3800–3600	√	√		Ge, W., Yang, S., Chen, Y., Dong, S., Jiao, T., Wang, M., et al. (2019). Investigating the late neolithic millet agriculture in Southeast China: New multidisciplinary evidences. Quat. Int., 529, 18–24.
20	Nanshan	26.3556	117.218	5000–4300	√	√	√	Yang, X., Chen, Q., Ma, Y., Li, Z., Hung, H.C., Zhang, Q., Jin, Z., Liu, S., Zhou, Z., and Fu, X. (2018) New radiocarbon and archaeobotanical evidence reveal the timing and route of southward dispersal of rice farming in South China. Science Bulletin 63:1495–1501
21	Baitoushan	26.1307	119.155	5000–3000	√		√	Dai, J., Cai, X., Jin, J., Ge, W., Huang, Y., Wu, W., Xia, T., Li, F. & Zuo, X. (2021). Earliest arrival of millet in the South China coast dating back to 5,500 years ago. J. Archaeol. Sci., 129, 105356.
21	Zhuangbianshan	26.1159	119.134	5000–3500	√			Ma, T., Zheng, Z., Rolett, B. V., Lin, G., Zhang, G., and Yue, Y. (2016). New evidence for Neolithic rice cultivation and Holocene environmental change in the Fuzhou Basin, southeast China. Veg. Hist. Archaeobot., 25(4), 375–386.
22	Huangguashan	26.7911	119.931	4000–3800	√	√	√	Deng, Z., Hung, H.–c., Fan, X., Huang, Y., and Lu, H. (2018). The Ancient Dispersal of Millets in Southern China: New Archaeological Evidence. Holocene 28 (1), 34–43
22	Pingfengshan	26.8127	119.994	3800–3600	√	√	√
23	Shixia	24.67	113.585	5000–4200	√			Zhang, W., Xiang, A., Qiu, L., and Xiao, D. (2007). Research on the Husks of Ancient rice in the Shixia Ruins. J. South. China Agric. 28, 20–23. (in Chinese).
24	Laoyuan	24.534	114.935	4700–4200	√	√		Yang X, Chen Q, Ma Y, Li Z, Hung HC, Zhang Q, Jin Z, Liu S, Zhou Z, Fu X (2018) New radiocarbon and archaeobotanical evidence reveal the timing and route of southward dispersal of rice farming in South China. Sci. Bull. 63:1495–1501
25	Shixiongshan	24.0513	115.622	2400–2200	√	√	√	Li Z, Zhao J, Li Q et al. (2016) Study on plant remains from the Shixiongshan site of Qin–Han Dynasties in hilly area of Guangdong province. Quat. Sci. 36: 1253–1262.
26	Gancaoling	23.304	113.548	4800–4200	√	√		Deng, Z., Huang, B., Zhang, Q., and Zhang, M. (2022). First Farmers in the south China coast: new evidence from the Gancaoling site of Guangdong province. Front. Earth Sci. 10, 858492. doi: 10.3389/feart.2022.858492
27	Shaha	22.3888	114.276	4500–4000	√			Lu, T. L. D., Zhao, Z., and Zheng, Z. (2005). “The Prehistoric and Historic Environments: Vegetations and Subsistence Strategies at Sha Ha, Sai Kung,” in The Ancient Culture of Hong Kong–archaeological Discoveries in ShaHa, Sai Kung. Editor Antiquities and Monuments Office of the Leisure and Cultural Services Department (Hongkong: Antiquities and Monuments Office of the Leisure and Cultural Servi…
28	Dalongdong	25.0748	121.517	4600–4200	√			this study
28	Zhiwuyuan	25.0316	121.509	4600–4000; 2300–1800	√	√		this study
29	Anhe	24.1756	120.623	4900–4000	√			this study
30	Nanguanli	22.9975	120.199	4800–4400	√			Tsang, C.H., Li, K.T. & Chu, C.Y. (2006). Footprints of ancestors: archaeological discoveries in TainanScience-based Industrial Park.Tainan: TainanCounty Government (in Chinese)
30	Nanguanlidong	22.9975	120.199	4800–4400	√	√	√	Hsieh, J. S., Hsing, Y. I. C., Hsu, T. F., Li, P. J. K., Li, K. T., and Tsang, C. H. (2011). Studies on ancient rice—where botanists, agronomists, archeologists, linguists, and ethnologists meet. Rice 4(3), 178–183. Tsang, C. H., Li, K. T., Hsu, T. F., Tsai, Y. C., Fang, P. H., and Hsing, Y. I. C. (2017). Broomcorn and foxtail millet were cultivated in Taiwan about 5000 years ago. Bot. Stud. 58(1…
30	Sanbaozhunan	23.11	120.27	4400–4200	√			Chiu, S. C., and Chu, C. Y. (2018) Excavation report of the Sanbaozhunan site. Tainan: Tree Valley Foundation. (in Chinese)
30	Youxianfang	23.115	120.274	3800–3300	√	√	√	Tsang, C.H., Li, K.T. & Chu, C.Y. (2006). Footprints of ancestors: archaeological discoveries in TainanScience-based Industrial Park.Tainan: TainanCounty Government (in Chinese)
31	Chaolaiqiao	22.8472	121.186	4500–4200	√			Deng, Z., Hung, H. C., Carson, M. T., Bellwood, P., Yang, S. L., and Lu, H. (2018). The first discovery of Neolithic rice remains in eastern Taiwan: phytolith evidence from the Chaolaiqiao site. Archaeol. Anthropol. Sci. 10, 1477–1484.
32	Magapit	18.1145	121.681	3200–2800	√			Hung, H. C., Tsang, C. H., Deng, Z., Bolunia, M. J. L. A., Santiago, R. A., Carson, M. T., and Bellwood, P. (2022). Preceramic riverside hunter–gatherers and the arrival of Neolithic farmers in northern Luzon. Antiquity 1–20. doi: 10.15184/aqy.2022.65
32	Nagsabaran	18.1566	121.642	2800–1600	√	√
33	Andarayan	17.688	121.726	4000–3300	√			Snow, B. E., Shutler, R., Nelson, D., Vogel, J. and Southon, J. (1986) Evidence of early rice cultivation in the Philippines. Philipp. Q. Cult. Soc. 14(1), 3–11 .
34	Gua Sireh	1.13335	110.549	2000–800	√			Barron, A., Datan, I., Bellwood, P., Wood, R., Fuller, D. Q., and Denham, T. (2020). Sherds as archaeobotanical assemblages: Gua Sireh reconsidered. Antiquity, 94(377), 1325–1336.
35	Minanga Sipakko	–2.44	119.442	3500–2800	√			Deng, Z., Hung, H. C., Carson, M. T., Oktaviana, A. A., Hakim, B., and Simanjuntak, T. (2020). Validating earliest rice farming in the Indonesian Archipelago. Sci. Rep., 10(1), 1–9.
36	Cai Beo	20.7189	107.051	4000	√			Wang, W.,Nguyen, K. D., Le, H. D., Zhao, C., Yang, X., Carson, M. T., and Hung, H.C. (2022). Before rice and the first rice: archaeobotanical study in Ha Long Bay, Northern Vietnam.Front. Earth Sci. 10:881104.
37	Samrong Sen	12.2167	104.783	3800–3200	√			Vanna, L. (2002). Rice remains in the prehistoric pottery tempers of the shell midden site of Samrong Sen: Implications forearly rice cultivation in central Cambodia, Aséanie 9: 13–34.
38	Krek 52/62	12.5278	105.441	3700	√
39	An Son	11.0482	106.32	4200–3100	√			Barron, A., Turner, M., Beeching, L., Bellwood, P., Piper, P., Grono, E., Jones, R., Oxenham, M., Kien, N. K. T., Senden, T., and Denham, T. (2017). MicroCT reveals domesticated rice (Oryza sativa) within pottery sherds from early Neolithic sites (4150–3265 cal BP) in Southeast Asia. Sci. Rep., 7: 7410
	Loc Giang	11.0482	106.32	4000–3300	√
40	Rach Nui	10.5539	106.678	3500–3200	√			Castillo C C, Fuller D Q, Piper P J, Bellwood P, Oxenham M. (2018). Hunter–gatherer specialization in the late neolithic of southern Vietnam —The case of Rach Nui. Quat Int, 489: 63–79
41	Non Nok Tha	16.658	102.376	4000–3000	√			Hedges, R. E. M., Housley, R. A., Bronk, C. R., and Klinken, G. J. V. (1991). Radiocarbon dates from the Oxford AMS system: Archaeometry datelist 13. Archaeometry, 33: 279–296
42	Khok Charoen	15.43	100.831	3500–3000	√			Vincent, B. (2002). ‘Ceramictechnologies in Bronze AgeThailand ’, Indo–Pacific Prehistory Association Bulletin 22: 73–82.
43	Ban Non Wat	15.2674	102.277	2800–2400	√			Higham, C., and Higham, T. (2009). A new chronological framework for prehistoric Southeast Asia, based on a Bayesian model from Ban Non Wat. Antiquity, 83: 125–144
44	Nil Kham Haeng	14.4007	100.572	2800–2000	√			Weber, S., Lehman, H., Barela, T., Hawks, S., and Harriman, D. (2010). Rice or millets: Early farming strategies in prehistoric central Thailand. Archaeol. Anthropol. Sci., 2: 79–88
	Non Mak La	14.4007	100.572	2800–2000	√
	Non Pa Wai	14.4007	100.572	4400–4100; 2800–2000	√
45	Khok Phanom Di	13.5849	101.141	4000–3500	√			Thompson, G.B. (1996).Theexcavation of KhokPhanom Di.A prehistoric site in CentralThailand. Vol. IV: Subsistenceand environment: The botanicalevidence. Research Reports ofthe Society of Antiquaries ofLondon No. LIII. London:Society of Antiquaries.
	Nong Nor	13.0845	101.054	3200–2800	√			Hedges, R. E. M., Housley, R. A., Ramsey, C. B., and Klinken, G. J. V. (1993). Radiocarbon dates from the Oxford AMS system: Archaeometry Datelist 17. Archaeometry, 35: 305–326
46	Khao Sam Kaeo	10.525	99.1917	2400–2000	√			Castillo, C. C., Bellina, B., and Fuller, D. Q. (2016). Rice, beans and trade crops on the early maritime Silk Route in Southeast Asia. Antiquity, 90(353), 1255–1269.
